# Supplementary material
Source: publisher figshare collection journal article supplement (https://acs.figshare.com/ndownloader/files/3719431)
Supplement: Supplementary file 1 [file 3719431]

## Sheet: TableS4
Table S4: NHDOT I contract blasting agents
The mass of each type of explosive used by date are given in Table S3.
Agent and Percent N
		Mass Percent
Blasting Agent	N total	N of NO3
BULK EMULSION	27.125	13.5625
SPARTAN BOOSTERS	22.379	9.303
BLASTEX	26.8105	13.8996
HYDROMITE	28	14
DYNOMAX PRO	25.9012	13.735
DYNOSPLIT RIGHT	26.0469	14.4969
EMULINE	27.6508	14.5258
Agent and Percent formula		Ingredients and percent mass ranges are from material safety data sheets
		molar mass		Mass Percent		BULK EMULSION			SPARTAN BOOSTERS			BLASTEX			HYDROMITE			DYNOMAX PRO			DYNOSPLIT RIGHT			EMULINE
Ingredients	formula	g/mol	N total	N of NO3		minimum	maximum	average	minimum	maximum	average	minimum	maximum	average	minimum	maximum	average	minimum	maximum	average	minimum	maximum	average	minimum	maximum	average
Ammonium Nitrate	NH4NO3	80.052	35	17.5		65	90	77.5				60	85	72.5	75	85	80	0	75	37.5	62	70	66	60	90	75
Sodium Nitrate	NaNO3	84.99	16.48	16.48								0	12	6				0	50	25	14	18	16	0	17	8.5
Methylamine Nitrate	CH6N2O3	94.0699	29.78	14.89								0	3	1.5
Pentaerythritol Tetranitrate	C5H8N4O12	316.137	17.72	17.72					35	70	52.5										0.5	3	1.75
Trinitrotoluene	C7H5N3O6	227.131	18.5						30	50	40
RDX	C3H6N6O6	222.116	37.84						0	25	12.5
HMX	C4H8N8O8	296.155	37.84						0	5	2.5
Nitroglycerin	C3H5N3O9	227.087	18.5	18.5														3	30	16.5
Ethylene Glycol Dinitrate	C2H4N2O6	152.063	18.42															5	50	27.5
Nitrocellulose	C20H16N4	312.368	17.94															0	6	3
sulfur	S	36.9711																0	4	2
Aluminum	Al	26.9815				0	10	5	0	15	7.5	0	10	5										0	10	5
Polymeric Surfactant						0.5	2	1.25
Mineral Oil		23.9979										0	6	3	6	9	7.5
Kerosene												0	6	3
Petroleum Hydrocarbons																								3	9	6
Fuel Oil/ Mineral Oil Blend						3	9	6
							% total	89.75		% total	115		% total	91		% total	87.5		% total	111.5		% total	83.75		% total	94.5
						total	%N	27.125	total	%N	22.379	total	%N	26.8105	total	%N	28	total	%N	25.9012	total	%N	26.0469	total	%N	27.6508
						NO3	%N	13.5625	NO3	%N	9.303	NO3	%N	13.8996	NO3	%N	14	NO3	%N	13.735	NO3	%N	14.4969	NO3	%N	14.5258
Ingredient and Percent element
http://www.convertunits.com/molarmass/
Ammonium Nitrate				NH4NO3		Trinitrotoluene				C7H5N3O6		Nitroglycerin				C3H5N3O9
Element	Symbol	Atomic Mass	# of Atoms	Mass Percent		Element	Symbol	Atomic Mass	# of Atoms	Mass Percent		Element	Symbol	Atomic Mass	# of Atoms	Mass Percent
Hydrogen	H	1.00794	4	0.05037		Hydrogen	H	1.00794	5	0.02219		Hydrogen	H	1.00794	5	0.02219
Nitrogen	N	14.0067	2	0.34998		Carbon	C	12.0107	7	0.37016		Carbon	C	12.0107	3	0.15867
Oxygen	O	15.9994	3	0.59965		Nitrogen	N	14.0067	3	0.185		Nitrogen	N	14.0067	3	0.18504
						Oxygen	O	15.9994	6	0.42265		Oxygen	O	15.9994	9	0.6341
Sodium Nitrate				NaNO3
Element	Symbol	Atomic Mass	# of Atoms	Mass Percent		RDX				C3H6N6O6		Ethylene Glycol Dinitrate				C2H4N2O6
Sodium	Na	22.9898	1	0.27048		Element	Symbol	Atomic Mass	# of Atoms	Mass Percent		Element	Symbol	Atomic Mass	# of Atoms	Mass Percent
Nitrogen	N	14.0067	1	0.1648		Hydrogen	H	1.00794	6	0.02723		Hydrogen	H	1.00794	4	0.02651
Oxygen	O	15.9994	3	0.56472		Carbon	C	12.0107	3	0.16222		Carbon	C	12.0107	2	0.15797
						Nitrogen	N	14.0067	6	0.37836		Nitrogen	N	14.0067	2	0.18422
Methylamine Nitrate				CH6N2O3		Oxygen	O	15.9994	6	0.43219		Oxygen	O	15.9994	6	0.63129
Element	Symbol	Atomic Mass	# of Atoms	Mass Percent
Hydrogen	H	1.00794	6	0.06429		HMX				C4H8N8O8		Nitrocellulose				C20H16N4
Carbon	C	12.0107	1	0.12768		Element	Symbol	Atomic Mass	# of Atoms	Mass Percent		Element	Symbol	Atomic Mass	# of Atoms	Mass Percent
Nitrogen	N	14.0067	2	0.29779		Hydrogen	H	1.00794	8	0.02723		Hydrogen	H	1.00794	16	0.05163
Oxygen	O	15.9994	3	0.51024		Carbon	C	12.0107	4	0.16222		Carbon	C	12.0107	20	0.76901
						Nitrogen	N	14.0067	8	0.37836		Nitrogen	N	14.0067	4	0.17936
Pentaerythritol Tetranitrate				C5H8N4O12		Oxygen	O	15.9994	8	0.43219
Element	Symbol	Atomic Mass	# of Atoms	Mass Percent
Hydrogen	H	1.00794	8	0.02551
Carbon	C	12.0107	5	0.18996
Nitrogen	N	14.0067	4	0.17722
Oxygen	O	15.9994	12	0.60731
